# Supplementary material
Source: ML conference proceedings conference paper supplement (https://proceedings.mlr.press/v28/lopes13.html)
Supplement: Supplementary file 1 [file lopes13-supp.pdf]

Supplementary material for  
*Estimating Unknown Sparsity in Compressed Sensing*

**Abstract**

In this supplement, we provide the proofs for the theoretical results in our submission *Estimating Unknown Sparsity in Compressed Sensing*.

**Proposition 1.**

*Proof of Proposition 1.* To prove the implication (i), we calculate

$$\begin{aligned}
 \frac{1}{\sqrt{T}} \frac{\|x-x_T\|_1}{\|x\|_2} &= \frac{1}{\sqrt{T}} \frac{\|x\|_1 - \|x_T\|_1}{\|x\|_2} \\
 &= \frac{\sqrt{s(x)}}{\sqrt{T}} - \frac{1}{\sqrt{T}} \frac{\|x_T\|_1}{\|x_T\|_2} \frac{\|x_T\|_2}{\|x\|_2} \\
 &= \frac{\sqrt{s(x)}}{\sqrt{T}} - \frac{\sqrt{s(x_T)}}{\sqrt{T}} \frac{\|x_T\|_2}{\|x\|_2}.
 \end{aligned} \tag{1}$$

Since  $s(x_T) \leq \|x_T\|_0 \leq T$ , and  $\frac{\|x_T\|_2}{\|x\|_2} \leq 1$ , we obtain the lower bound

$$\frac{1}{\sqrt{T}} \frac{\|x-x_T\|_1}{\|x\|_2} \geq \frac{\sqrt{s(x)}}{\sqrt{T}} - 1.$$

Hence, if the left hand side is at most  $\varepsilon$ , we must have  $T \geq \frac{s(x)}{(1+\varepsilon)^2}$ , proving (i).

To prove the second implication, note that  $T \geq c \log(p) \frac{\|x\|_1^2}{\|x\|_2^2}$  implies

$$\begin{aligned}
 \frac{1}{\sqrt{T}} \frac{\|x-x_T\|_1}{\|x\|_2} &\leq \frac{1}{\sqrt{c \log(p)}} \frac{\|x-x_T\|_1}{\|x\|_1} \\
 &= \frac{1}{\sqrt{c \log(p)}} \left(1 - \frac{\|x_T\|_1}{\|x\|_1}\right).
 \end{aligned} \tag{2}$$

Next, consider the probability vectors  $u, v \in \mathbb{R}^p$  defined by  $u_i = 1/p$  and  $v_i = |x_{[i]}|/\|x\|_1$  (that is,  $v_1 \geq v_2 \geq \dots \geq v_p$ ). It is a basic fact about the majorization ordering on  $\mathbb{R}^p$  that  $u$  is majorized by any other probability vector (Marshall et al., 2010, p. 7). In particular, we have  $\sum_{i=1}^T u_i \leq \sum_{i=1}^T v_i$  for any  $T \in \{1, \dots, p\}$ , which is the same as

$$\frac{T}{p} \leq \frac{\|x_T\|_1}{\|x\|_1}.$$

Combining this with line (2) proves (ii). □

## Theorem 1.

*Proof of Theorem 1.* Define the noiseless version of the measurement  $y_i$  to be

$$y_i^\circ := \langle a_i, x \rangle, \quad i = 1, \dots, n_1 + n_2$$

and let the noiseless versions of the statistics  $\widehat{T}_1$  and  $\widehat{T}_2$  be given by

$$\tilde{T}_1 := \frac{1}{\gamma} \text{median}(|y_1^\circ|, \dots, |y_{n_1}^\circ|) \quad (3)$$

$$\tilde{T}_2^2 := \frac{1}{\gamma^2 n_2} \left( (y_{n_1+1}^\circ)^2 + \dots + (y_{n_1+n_2}^\circ)^2 \right). \quad (4)$$

It is convenient to work in terms of these variables, since their limiting distributions may be computed exactly. Due to the fact that  $\frac{y_1^\circ}{\gamma \|x\|_1}, \dots, \frac{y_{n_1}^\circ}{\gamma \|x\|_1}$  is an i.i.d. sample from the standard Cauchy distribution  $C(0, 1)$ , the asymptotic normality of the sample median implies

$$\sqrt{n/2} \left( \frac{\tilde{T}_1}{\|x\|_1} - 1 \right) \xrightarrow{\mathcal{L}} N(0, \tau_1^2), \quad (5)$$

where  $\tau_1^2 = \pi^2/8$ . Additional details may be found in (David, Theorem 9.2) and (Li et al., 2007, Lemma 3). Similarly, the variables  $(\frac{y_{n_1+1}^\circ}{\gamma \|x\|_2})^2, \dots, (\frac{y_{n_1+n_2}^\circ}{\gamma \|x\|_2})^2$  are an i.i.d. sample from the chi-square distribution on one degree of freedom, and so it follows from the delta method that

$$\sqrt{n/2} \left( \frac{\tilde{T}_2}{\|x\|_2} - 1 \right) \xrightarrow{\mathcal{L}} N(0, \tau_2^2), \quad (6)$$

where  $\tau_2^2 = 1/2$ . Note that in proving the last two limit statements, we intentionally scaled the variables  $y_i^\circ$  in such a way that their distributions did not depend on any model parameters. It is for this reason that the limits hold even when the model parameters are allowed to depend on  $n$ . We conclude from the limits (5) and (6) that for any  $\alpha \in (0, 1/2)$ ,

$$\mathbb{P} \left( \frac{\tilde{T}_1}{\|x\|_1} \in \left[ 1 - \frac{\tau_1 z_{1-\alpha}}{\sqrt{n/2}}, 1 + \frac{\tau_1 z_{1-\alpha}}{\sqrt{n/2}} \right] \right) = 1 - 2\alpha + o(1), \quad (7)$$

and

$$\mathbb{P} \left( \frac{\tilde{T}_2}{\|x\|_2} \in \left[ 1 - \frac{\tau_2 z_{1-\alpha}}{\sqrt{n/2}}, 1 + \frac{\tau_2 z_{1-\alpha}}{\sqrt{n/2}} \right] \right) = 1 - 2\alpha + o(1). \quad (8)$$

We now relate  $\widehat{T}_1$  and  $\widehat{T}_2$  in terms of intervals defined by  $\tilde{T}_1$  and  $\tilde{T}_2$ . Since the noise variables are bounded by  $|\epsilon_i| \leq \sigma_0$ , and  $y_i = y_i^\circ + \epsilon_i$ , it is easy to see that

$$\widehat{T}_1 \in [\tilde{T}_1 - \frac{\sigma_0}{\gamma}, \tilde{T}_1 + \frac{\sigma_0}{\gamma}].$$

Consequently, if we note that  $\frac{\sigma_0}{\gamma \|x\|_1} \leq \frac{\sigma_0}{\gamma \|x\|_2} = \rho$ , then we may write

$$\frac{\widehat{T}_1}{\|x\|_1} \in \left[ \frac{\tilde{T}_1}{\|x\|_1} - \rho, \frac{\tilde{T}_1}{\|x\|_1} + \rho \right]. \quad (9)$$

To derive a similar relationship involving  $\widehat{T}_2$  and  $\widetilde{T}_2$ , if we write  $\widehat{T}_2$  in terms of  $\|(y_{n_1}, \dots, y_{n_1+n_2})\|_2$  and apply the triangle inequality, it follows that

$$\frac{\widehat{T}_2}{\|x\|_2} \in \left[ \frac{\widetilde{T}_2}{\|x\|_2} - \rho, \frac{\widetilde{T}_2}{\|x\|_2} + \rho \right]. \quad (10)$$

The proof may now be completed by assembling the last several items. Recall the parameters  $\delta_n$  and  $\eta_n$ , which are given by

$$\delta_n = \delta_n(\alpha, \rho) = \frac{\tau_1 z_{1-\alpha}}{\sqrt{n/2}} + \rho \quad (11)$$

$$\eta_n = \eta_n(\alpha, \rho) = \frac{\tau_2 z_{1-\alpha}}{\sqrt{n/2}} + \rho. \quad (12)$$

Combining the limits (7) and (8) with the intervals (9) and (10), we have the following asymptotic bounds for the statistics  $\widehat{T}_1$  and  $\widehat{T}_2$ ,

$$\mathbb{P}\left(\frac{\widehat{T}_1}{\|x\|_1} \in [1 - \delta_n, 1 + \delta_n]\right) \geq 1 - 2\alpha + o(1), \quad (13)$$

and

$$\mathbb{P}\left(\frac{\widehat{T}_2}{\|x\|_2} \in [1 - \eta_n, 1 + \eta_n]\right) \geq 1 - 2\alpha + o(1). \quad (14)$$

Due to the independence of  $\widehat{T}_1$  and  $\widehat{T}_2$ , and the relation

$$\sqrt{\frac{\widehat{s}(x)}{s(x)}} = \frac{\widehat{T}_1/\|x\|_1}{\widehat{T}_2/\|x\|_2},$$

we conclude that

$$\mathbb{P}\left(\sqrt{\frac{\widehat{s}(x)}{s(x)}} \in \left[\frac{1-\delta_n}{1+\eta_n}, \frac{1+\delta_n}{1-\eta_n}\right]\right) \geq (1 - 2\alpha)^2 + o(1). \quad (15)$$

□

## Theorem 2.

The proof of Theorem 2 is almost the same as the proof of Theorem 1 and we omit the details. One point of difference is that in Theorem 1, the bounding probability is  $(1 - 2\alpha)^2$ , whereas in Theorem 2 it is  $(1 - 2\alpha)$ . The reason is that in the case of Theorem 2, the condition  $\widetilde{T}_1/\|x\|_1 \in [1 - \varrho, 1 + \varrho]$  holds with probability 1, whereas the analogous statement  $\widehat{T}_1/\|x\|_1 \in [1 - \rho, 1 + \rho]$  holds with probability  $1 - 2\alpha$  in the case of Theorem 1.

## Theorem 3.

The following lemma illustrates the essential reason why estimating  $s(x)$  is difficult in the deterministic case. The idea is that for any measurement matrix  $A$ , it is possible to find two signals that are indistinguishable with respect to  $A$ , and yet have very different sparsity levels in terms of  $s(\cdot)$ . We prove Theorem 3 after giving the proof of the lemma.

**Lemma 1.** *Let  $A \in \mathbb{R}^{n \times p}$  be an arbitrary matrix, and let  $x \in \mathbb{R}^p$  be an arbitrary signal. Then, there exists a non-zero vector  $\tilde{x} \in \mathbb{R}^p$  satisfying  $Ax = A\tilde{x}$ , and*

$$s(\tilde{x}) \geq \frac{p-n}{(1+2\sqrt{2\log(2p)})^2}. \quad (16)$$

*Proof of Lemma 1.* By Hölder's inequality,  $\|\tilde{x}\|_1^2/\|\tilde{x}\|_2^2 \geq \|\tilde{x}\|_2^2/\|\tilde{x}\|_\infty^2$ , and so it suffices to lower-bound the second ratio. The overall approach to finding a dense vector  $\tilde{x}$  is to use the probabilistic method. Let  $B \in \mathbb{R}^{p \times (p-r)}$  be a matrix whose columns are an orthonormal basis for the null space of  $A$ , where  $r = \text{rank}(A)$ . Also define the scaled matrix  $\tilde{B} := \|x\|_\infty B$ . Letting  $z \in \mathbb{R}^{p-r}$  be a standard Gaussian vector, we will consider  $\tilde{x} := x + \tilde{B}z$ , which satisfies  $Ax = A\tilde{x}$  for all realizations of  $z$ . We begin the argument by defining the function

$$f(z) := \|x + \tilde{B}z\|_2 - c(n, p) \cdot \|x + \tilde{B}z\|_\infty, \quad (17)$$

where

$$c(n, p) := \frac{\sqrt{p-n}}{1+2\sqrt{2\log(2p)}}.$$

The proof amounts to showing that the event  $\{f(z) > 0\}$  holds with positive probability. To see this, notice that the event  $\{f(z) > 0\}$  is equivalent to

$$\frac{\|\tilde{x}\|_2}{\|\tilde{x}\|_\infty} = \frac{\|x + \tilde{B}z\|_2}{\|x + \tilde{B}z\|_\infty} > \frac{\sqrt{p-n}}{1+2\sqrt{2\log(2p)}}.$$

We will prove that  $\mathbb{P}(f(z) > 0)$  is positive by showing that  $\mathbb{E}[f(z)] > 0$ , and this will be accomplished by lower-bounding the expected value of  $\|x + \tilde{B}z\|_2$ , and upper-bounding the expected value of  $\|x + \tilde{B}z\|_\infty$ .

First, to lower-bound  $\|x + \tilde{B}z\|_2$ , we begin by considering the variance of  $\|x + \tilde{B}z\|_2$ , and use the fact that  $\|\tilde{B}z\|_2^2 = z^\top \tilde{B}^\top \tilde{B}z = \|x\|_\infty^2 \|z\|_2^2$ , obtaining

$$\begin{aligned} \mathbb{E}\|x + \tilde{B}z\|_2 &= \sqrt{\mathbb{E}\|x + \tilde{B}z\|_2^2 - \text{var}\|x + \tilde{B}z\|_2} \\ &= \sqrt{\|x\|_2^2 + \|x\|_\infty^2 (p-r) - \text{var}\|x + \tilde{B}z\|_2}. \end{aligned} \quad (18)$$

To upper-bound the variance, we use the Poincaré inequality for the standard Gaussian measure on  $\mathbb{R}^{p-r}$  Beckner (1989). Since the function  $g(z) := \|x + \tilde{B}z\|_2$  has a Lipschitz constant equal to  $\|\tilde{B}\|_{\text{op}} = \|x\|_\infty$  with respect to the Euclidean norm, it follows that  $\|\nabla g(z)\|_2 \leq \|x\|_\infty$ . Consequently, the Poincaré inequality implies

$$\text{var}\|x + \tilde{B}z\|_2 \leq \|x\|_\infty^2.$$

Using this in conjunction with the inequality (18), and the fact that  $r = \text{rank}(A)$  is at most  $n$ , we obtain the lower bound

$$\mathbb{E}\|x + Bz\|_2 \geq \sqrt{\|x\|_2^2 + \|x\|_\infty^2 (p-n) - \|x\|_\infty^2}. \quad (19)$$

The second main portion of the proof is to upper-bound  $\mathbb{E}\|x + \tilde{B}z\|_\infty$ . Since  $\|x + \tilde{B}z\|_\infty \leq \|x\|_\infty + \|\tilde{B}z\|_\infty$ , it is enough to upper-bound  $\mathbb{E}\|\tilde{B}z\|_\infty$ , and we will

do this using a version of Slepian's inequality. If  $\tilde{b}_i$  denotes the  $i^{\text{th}}$  row of  $\tilde{B}$ , define  $g_i = \langle \tilde{b}_i, z \rangle$ , and let  $w_1, \dots, w_p$  be i.i.d.  $N(0, 1)$  variables. The idea is to compare the Gaussian process  $g_i$  with the Gaussian process  $\|x\|_\infty w_i$ . By Proposition A.2.6 in van der Vaart and Wellner van der Vaart & Wellner (1996), the inequality

$$\mathbb{E}\|\tilde{B}z\|_\infty = \mathbb{E}\left[\max_{i=1,\dots,p} |g_i|\right] \leq 2\|x\|_\infty \mathbb{E}\left[\max_{i=1,\dots,p} |w_i|\right],$$

holds as long as the condition  $\mathbb{E}(g_i - g_j)^2 \leq \|x\|_\infty^2 \mathbb{E}(w_i - w_j)^2$  is satisfied for all  $i, j \in \{1, \dots, p\}$ , and this is simple to verify. To finish the proof, we make use of a standard bound for the expectation of Gaussian maxima

$$\mathbb{E}\left[\max_{i=1,\dots,p} |w_i|\right] < \sqrt{2 \log(2p)},$$

which follows from a modification of the proof of Massart's finite class lemma (Massart, 2000, Lemma 5.2)<sup>1</sup>. Combining the last two steps, we obtain

$$\mathbb{E}\|x + Bz\|_\infty < \|x\|_\infty + 2\|x\|_\infty \sqrt{2 \log(2p)}. \quad (20)$$

Finally, applying the bounds (19) and (20) to the definition of the function  $f$  in (17), we have

$$\begin{aligned} \frac{\mathbb{E}\|x + Bz\|_2}{\mathbb{E}\|x + Bz\|_\infty} &> \frac{\sqrt{\|x\|_2^2 + \|x\|_\infty^2(p-n) - \|x\|_\infty^2}}{\|x\|_\infty + 2\|x\|_\infty \sqrt{2 \log(2p)}} \\ &= \frac{\sqrt{\frac{\|x\|_2^2}{\|x\|_\infty^2} + (p-n) - 1}}{1 + 2\sqrt{2 \log(2p)}} \\ &\geq \frac{\sqrt{p-n}}{1 + 2\sqrt{2 \log(2p)}}, \end{aligned} \quad (21)$$

which proves  $\mathbb{E}[f(z)] > 0$ , as needed.  $\square$

We now apply Lemma 3 to prove Theorem 3.

*Proof of Theorem 3.* We begin by making several reductions. First, it is enough to show that

$$\inf_{A \in \mathbb{R}^{n \times p}} \inf_{\delta: \mathbb{R}^n \rightarrow \mathbb{R}} \sup_{x \in \mathbb{R}^p \setminus \{0\}} \left| \delta(Ax) - s(x) \right| \geq \frac{p-n-1}{2(1 + 2\sqrt{2 \log(2p)})^2}. \quad (22)$$

To see this, note that the general inequality  $s(x) \leq p$  implies

$$\left| \frac{\delta(Ax)}{s(x)} - 1 \right| \geq \frac{1}{p} \left| \delta(Ax) - s(x) \right|,$$

<sup>1</sup>The "extra" factor of 2 inside the logarithm arises from taking the absolute value of the  $w_i$ .

and we can optimize over both sides with  $p$  being a constant. Next, for any fixed matrix  $A \in \mathbb{R}^{n \times p}$ , it is enough to show that

$$\inf_{\delta: \mathbb{R}^n \rightarrow \mathbb{R}} \sup_{x \in \mathbb{R}^p \setminus \{0\}} \left| \delta(Ax) - s(x) \right| \geq \frac{p-n-1}{2(1+2\sqrt{2\log(2p)})^2}, \quad (23)$$

as we may take the infimum over all matrices  $A$  without affecting the right hand side. To make a third reduction, it is enough to prove the same bound when  $\mathbb{R}^p \setminus \{0\}$  is replaced with any smaller set, as this can only make the supremum smaller. In particular, we will replace  $\mathbb{R}^p \setminus \{0\}$  with a two-point subset  $\{x^\circ, \tilde{x}\} \subset \mathbb{R}^p \setminus \{0\}$ , where by Lemma 1, we may choose  $\tilde{x}$  and  $x^\circ$  to satisfy  $Ax^\circ = A\tilde{x}$ , as well as

$$s(x^\circ) = 1, \quad \text{and} \quad s(\tilde{x}) \geq \frac{p-n}{2(1+2\sqrt{2\log(2p)})^2}.$$

We now aim to prove that

$$\inf_{\delta: \mathbb{R}^n \rightarrow \mathbb{R}} \sup_{x \in \{x^\circ, \tilde{x}\}} \left| \delta(Ax) - s(x) \right| \geq \frac{p-n-1}{2(1+2\sqrt{2\log(2p)})^2}, \quad (24)$$

and we will accomplish this using the classical technique of constructing a Bayes procedure with constant risk. For any decision rule  $\delta: \mathbb{R}^n \rightarrow \mathbb{R}$  and any point  $x \in \{x^\circ, \tilde{x}\}$ , define the (deterministic) risk function

$$R(x, \delta) := \left| \delta(Ax) - s(x) \right|.$$

Also, for any prior  $\pi$  on  $\{x^\circ, \tilde{x}\}$ , define

$$r(\pi, \delta) := \int R(x, \delta) d\pi(x).$$

By Propositions 3.3.1 and 3.3.2 of Bickel & Doksum (2001), the inequality (24) holds if there exists a prior distribution  $\pi^*$  on  $\{x^\circ, \tilde{x}\}$  and a decision rule  $\delta^*: \mathbb{R}^n \rightarrow \mathbb{R}$  with the following three properties:

1. The rule  $\delta^*$  is Bayes for  $\pi^*$ , i.e.  $r(\pi^*, \delta^*) = \inf_{\delta} r(\pi^*, \delta)$ .
2. The rule  $\delta^*$  has constant risk over  $\{x^\circ, \tilde{x}\}$ , i.e.  $R(x^\circ, \delta^*) = R(\tilde{x}, \delta^*)$ .
3. The constant value of the risk of  $\delta^*$  is at least  $\frac{p-n-1}{2(1+2\sqrt{2\log(2p)})^2}$ .

To exhibit  $\pi^*$  and  $\delta^*$  with these properties, we define  $\pi^*$  to be the two-point prior that puts equal mass at  $x^\circ$  and  $\tilde{x}$ , and we define  $\delta^*$  to be the trivial decision rule that always returns the average of the two possibilities, namely  $\delta^*(Ax) = \frac{1}{2}(s(\tilde{x}) + s(x^\circ))$ . It is simple to check the second and third properties, namely that  $\delta^*$  has constant risk equal to  $\frac{1}{2}|s(\tilde{x}) - s(x^\circ)|$ , and that this risk is at least  $\frac{p-n-1}{2(1+2\sqrt{2\log(2p)})^2}$ . It remains to check that  $\delta^*$  is Bayes for  $\pi^*$ . This follows easily

from the triangle inequality, and the fact that  $\delta(A\tilde{x}) = \delta(Ax^\circ)$  holds for all  $\delta$ . Namely,

$$\begin{aligned} r(\pi^*, \delta) &= \frac{1}{2} \left| \delta(A\tilde{x}) - s(\tilde{x}) \right| + \frac{1}{2} \left| \delta(Ax^\circ) - s(x^\circ) \right|, \\ &\geq \frac{1}{2} \left| s(\tilde{x}) - s(x^\circ) \right| \\ &= r(\pi^*, \delta^*). \end{aligned} \tag{25}$$

□

## References

- Beckner, W. A generalized Poincaré inequality for Gaussian measures. *Proceedings of the American Mathematical Society*, 105(2):397–400, 1989.
- Bickel, P.J. and Doksum, K.A. *Mathematical Statistics, volume I*. Prentice Hall, 2001.
- David, H.A. Order statistics. 1981. *J. Wiley*.
- Li, P., Hastie, T., and Church, K. Nonlinear estimators and tail bounds for dimension reduction in  $l_1$  using cauchy random projections. *Journal of Machine Learning Research*, pp. 2497–2532, 2007.
- Marshall, A.W., Olkin, I., and Arnold, B.C. *Inequalities: theory of majorization and its applications*. Springer, 2010.
- Massart, P. Some applications of concentration inequalities to statistics. In *Annales-Faculte des Sciences Toulouse Mathematiques*, volume 9, pp. 245–303. Université Paul Sabatier, 2000.
- van der Vaart, A.W. and Wellner, J.A. *Weak convergence and empirical processes*. Springer Verlag, 1996.
